# Supplementary material
Source: MDPI journal article supplement (https://www.mdpi.com/1999-4907/13/3/469)
Supplement: s1 [file s1]

Table S1. Soil properties characterization of different stand ages of *P. massoniana* plantations. The lower-case letters (a-c) represent significant difference among the age treatments ( $p<0.05$ ).

| Soil properties | 9-year         | 18-year       | 28-year       | 48-year        | <i>p</i> |
|-----------------|----------------|---------------|---------------|----------------|----------|
| BD              | 2.18±0.11a     | 2.04±0.09a    | 1.83±0.06ab   | 2.21±0.12b     | 0.05     |
| pH              | 5.42±1.24a     | 5.4±2.11ab    | 5.11±1.91ab   | 5.01±2.21b     | 0.0783   |
| SAN             | 182.00±46.35ab | 224.00±69.45b | 217.00±54.31a | 210.24±51.23ab | 0.1227   |
| SAP             | 3.74±1.04a     | 5.21±1.51a    | 3.55±1.13b    | 2.82±0.82b     | 0.6818   |
| SWC             | 11.23±3.91a    | 12.45±3.24a   | 13.32±4.54a   | 12.42±4.41a    | 0.05     |
| EC              | 27.11±8.62a    | 29.33±11.41a  | 33.14±15.25b  | 31.52±16.44c   | 0.05     |
| MBC             | 192.42±66.28a  | 211.36±74.24b | 265.82±86.42c | 245.51±66.35d  | 0.05     |
| MBN             | 26.46±8.37a    | 34.88±12.67b  | 32.65±15.72c  | 31.28±16.67bc  | 0.05     |

Note: SAP, soil available phosphorus, BD, soil bulk density, SAN, soil available nitrogen, SWC, soil water content, MBN, microbial biomass nitrogen, MBC, microbial biomass carbon, EC, soil electrical conductivity.

Table S2. Contents of C, N and P in different plant components of *P. massoniana* plantations chronosequence. ( $\pm$ =standard deviation, the lower-case letters (a-c) represent significant difference among the age treatments ( $p<0.05$ )).

| Component | C (g kg <sup>-1</sup> ) |                    |                   |                   | N (g kg <sup>-1</sup> ) |                 |                 |                 | P (g kg <sup>-1</sup> ) |                |                 |                 |
|-----------|-------------------------|--------------------|-------------------|-------------------|-------------------------|-----------------|-----------------|-----------------|-------------------------|----------------|-----------------|-----------------|
|           | 9-Year                  | 18-Year            | 28-Year           | 48-Year           | 9-Year                  | 18-Year         | 28-Year         | 48-Year         | 9-Year                  | 18-Year        | 28-Year         | 48-Year         |
| Leaf      | 436.1 $\pm$ 42.4c       | 601.2 $\pm$ 51.6a  | 550.8 $\pm$ 49.5b | 417.8 $\pm$ 34.2c | 10.7 $\pm$ 3.2a         | 9.7 $\pm$ 2.2a  | 9.7 $\pm$ 3.4a  | 11.8 $\pm$ 4.4a | 1.6 $\pm$ 0.5b          | 0.9 $\pm$ 0.2c | 1.4 $\pm$ 0.4b  | 2.5 $\pm$ 1.2a  |
| Branch    | 412.8 $\pm$ 35.5b       | 611.2 $\pm$ 57.3a  | 560.8 $\pm$ 53.3a | 394.5 $\pm$ 33.2b | 5.1 $\pm$ 2.4ab         | 3.8 $\pm$ 1.7b  | 5.3 $\pm$ 2.1ab | 7.9 $\pm$ 2.7a  | 1.5 $\pm$ 0.7b          | 0.8 $\pm$ 0.2c | 1.0 $\pm$ 0.5c  | 2.6 $\pm$ 1.9a  |
| Root      | 408.5 $\pm$ 44.3c       | 417.5 $\pm$ 55.2ab | 422.7 $\pm$ 41.5a | 418.1 $\pm$ 57.1c | 2.2 $\pm$ 1.1b          | 2.7 $\pm$ 1.1b  | 3.8 $\pm$ 1.1a  | 4.2 $\pm$ 1.8a  | 1.8 $\pm$ 0.6a          | 0.9 $\pm$ 0.2c | 1.5 $\pm$ 0.7b  | 1.8 $\pm$ 0.6a  |
| Herb      | 429.5 $\pm$ 50.2a       | 518.2 $\pm$ 44.2a  | 510.6 $\pm$ 58.2a | 398.8 $\pm$ 47.2b | 11.8 $\pm$ 2.8a         | 12.3 $\pm$ 3.5a | 9.5 $\pm$ 3.7b  | 9.3 $\pm$ 2.6a  | 2.2 $\pm$ 0.6a          | 1.2 $\pm$ 0.5b | 1.4 $\pm$ 0.5b  | 2.3 $\pm$ 0.9a  |
| Shrub     | 452.6 $\pm$ 47.2a       | 541.7 $\pm$ 43.1a  | 532.3 $\pm$ 59.1a | 325.9 $\pm$ 49.8b | 10.9 $\pm$ 3.5a         | 11.4 $\pm$ 4.1a | 8.9 $\pm$ 3.5a  | 9.5 $\pm$ 3.5a  | 1.8 $\pm$ 0.2a          | 1.1 $\pm$ 0.8c | 1.6 $\pm$ 0.4b  | 1.3 $\pm$ 0.8   |
| Litter    | 474.5 $\pm$ 47.5a       | 563.2 $\pm$ 53.8a  | 554.7 $\pm$ 55.2a | 330.5 $\pm$ 44.5b | 10.0 $\pm$ 2.8a         | 10.0 $\pm$ 2.9a | 8.0 $\pm$ 2.4a  | 8.8 $\pm$ 3.3a  | 1.6 $\pm$ 0.8a          | 0.9 $\pm$ 0.3c | 1.1 $\pm$ 0.6bc | 1.5 $\pm$ 0.3ab |

Table S3. Stoichiometry of C, N and P in different plant components of *P. massoniana* plantations chronosequence. Values are mean  $\pm$  standard deviation. Lower-case letters represent significant difference among the treatments.

| Component    | C: N             |                  |                 |                 | C: P        |              |              |                 | N: P           |            |                |                |
|--------------|------------------|------------------|-----------------|-----------------|-------------|--------------|--------------|-----------------|----------------|------------|----------------|----------------|
|              | 9-Year           | 18-Year          | 28-Year         | 48-Year         | 9-Year      | 18-Year      | 28-Year      | 48-Year         | 9-Year         | 18-Year    | 28-Year        | 48-Year        |
| <b>Trees</b> |                  |                  |                 |                 |             |              |              |                 |                |            |                |                |
|              | 48.2 $\pm$       | 72.2 $\pm$       | 71.2 $\pm$      | 42.1 $\pm$      | 704.4 $\pm$ | 1814.2 $\pm$ | 1025.7 $\pm$ | 441.8 $\pm$     | 14.8 $\pm$     | 25.1 $\pm$ | 16.1 $\pm$     | 10.6 $\pm$     |
| Leaf         | 18.1bc           | 23.2a            | 19.1ab          | 14.5c           | 60.7c       | 203.5a       | 320.2b       | 89.6c           | 5.5b           | 12.5a      | 6.3b           | 5.4b           |
| Branch       | 102.8 $\pm$      | 189.4 $\pm$      | 128.0 $\pm$     | 66.9 $\pm$      | 695.7 $\pm$ | 1965.0 $\pm$ | 1730.5 $\pm$ | 397.7 $\pm$     | 7.3 $\pm$ 2.1b | 10.6 $\pm$ | 15.1 $\pm$     | 6.9 $\pm$ 3.1b |
|              | 44.8b            | 57.1a            | 34.8ab          | 25.6b           | 79.5bc      | 79.5a        | 148.5ab      | 89.5c           |                | 4.5a       | 6.2a           |                |
| Root         |                  | 63.1 $\pm$ 23.2a | 94.6 $\pm$ 25.2 | 87.2 $\pm$ 27.5 | 452.4 $\pm$ | 512.9 $\pm$  | 892.7 $\pm$  | 720.5 $\pm$     | 10. $\pm$      | 9.5 $\pm$  | 12.3 $\pm$     | 13.7 $\pm$     |
|              | 47.2 $\pm$ 15.5c | b                | a               | a               | 43.4c       | 42.9ab       | 57.5a        | 72.8a           | 6.9ac          | 3.8c       | 3.4b           | 4.5a           |
| Herb         | 42.1 $\pm$ 12.6  | 52.1 $\pm$       | 60.4 $\pm$      | 31.8 $\pm$      | 477.6 $\pm$ | 1069.4 $\pm$ | 1055.9 $\pm$ | 315.5 $\pm$     | 11.4 $\pm$     | 21.0 $\pm$ | 17.5 $\pm$     | 10.2 5.2 $\pm$ |
|              | bc               | 15.2ab           | 19.8a           | 15.5c           | 55.8b       | 351.6a       | 342.4a       | 88.7b           | 5.6c           | 7.9a       | 8.5ab          | 4.2c           |
| Shrub        | 48.3 $\pm$       | 59.7 $\pm$       | 70.1 $\pm$      | 38.0 $\pm$      | 678.6 $\pm$ | 1246.6 $\pm$ | 1087. $\pm$  | 522.3 $\pm$ 92c | 14.1 $\pm$     | 21.9 $\pm$ | 15.6 $\pm$ 6.2 | 14.0 $\pm$ 3.2 |
|              | 14.2bc           | 21.8ab           | 35.5a           | 18.1c           | 173.5bc     | 325.5a       | 229.5ab      |                 | 5.2b           | 8.2a       | ab             | b              |
| Litter       | 55.3 $\pm$       | 68.3 $\pm$       | 81.4 $\pm$      | 45.0 $\pm$      | 795.9 $\pm$ | 1558.6 $\pm$ | 1306.5 $\pm$ | 601.0 $\pm$     | 14.5 $\pm$     | 23.8 $\pm$ | 16.2 $\pm$     | 14.5 $\pm$     |
|              | 23.5bc           | 27.2ab           | 29.4a           | 22.5c           | 156.5b      | 412.8a       | 311.8a       | 212.6b          | 6.6b           | 8.5a       | 4.4b           | 3.5b           |
